# Supplementary material for: Expression of Histophilus somni IbpA DR2 protective antigen in the diatom Thalassiosira pseudonana
Source: PubMed Central journal article supplement (PMC5486823; doi:10.1007/s00253-017-8267-8), 2017-04-12
Supplement: 253_2017_8267_MOESM1_ESM.pdf [file 253_2017_8267_MOESM1_ESM.pdf]

## Supplementary Material

Journal of Applied Microbiology and Biotechnology

### **Expression of *Histophilus somni* IbpA DR2 protective antigen in the diatom *Thalassiosira pseudonana***

Aubrey Davis<sup>1</sup>, Lauren T. Crum<sup>2</sup>, Lynette B. Corbeil<sup>2</sup>, Mark Hildebrand<sup>1\*\*</sup>

<sup>1</sup> Marine Biology Research Division, Scripps Institution of Oceanography, UC San Diego, La Jolla, CA

<sup>2</sup> Department of Pathology, School of Medicine, UC San Diego, San Diego, CA

\*\*Corresponding author, [mhildebrand@ucsd.edu](mailto:mhildebrand@ucsd.edu), phone: 858-822-0167, fax: 858-534-7313, 9500

Gilman Drive, La Jolla, CA 92093-0202

**Supplementary Figure S1** Construct maps. Design of constructs used to generate transgenic diatom lines. Uninformative regions of construct maps have been omitted for clarity.

**Supplementary Figure S2** IbpA DR2 sequences. a) Codon optimized and mutagenized IbpA DR2 nucleotide sequences in FASTA format. Altered nucleotides underlined and bold. b) Amino acid alignment showing the H:A mutation in bold

**Supplementary Table S1** Primers used for amplification and construct synthesis

Figure S1

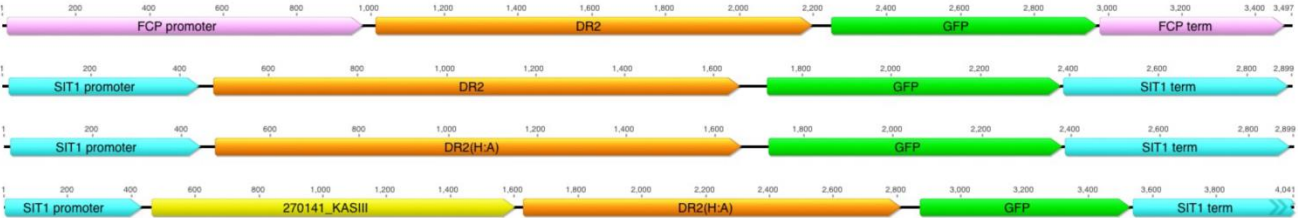

## Figure S2

### a) Nucleotide Sequences:

```
>DR2_Domain_Codon_optimized_for_Tp_Start_Met_added
ATGTCTGTGAACGAGGTGGCTCCACTCTCTTCTGTGCCAGCTGAGCTCAAGGATGCTGCTGGAGGAAACAA
GAAGGCTGCTGAGAAGTCTGAGGGAGCTACCGGAGTGGAGAAGGAGAAGACCACCCTCTTCCAACGTGTGA
AGCAATTCTTACCAGGATCTAAGTCTGGAGCTAAGCCAGTGGCTGGAGATGAGACCGCTAACAAGGTGAAC
TACCAAGATCTCGAGGATAACCTCAACCTCAAGGGACTCATCTCTCTCGAGGATGATCGTAACGCTAACCTT
CGAGTCTAACGTGCTCAAGAACGAGAAGTTCCTCGATGAGGCTCGTGAGATCTCTAAGAAGTCTATCCCAG
AGGCTACCGTGAAGCAAATGTCTCACCTCCCAGAGTTCGATGATATCCTCACCGAGGGAGCTAAGAAGGTG
GAGTCTCGTATCAACAAGGCTATCACCTTCCGTCCATCTGTGGAGGAGTTCCTCTGAGATCCAAGATCTCGT
GAAGACCCTCCCAAAGACCAAGGTGATCGAGGATCTCTCTACCAAGACCAACGAGATCACCGAGGCTCTCG
CTGCTACCTCTAAGACCATCCAACGTACCCAGAGCTCAAGGAGCAACTCAAGACCGCTATCGAGGATTTTC
CTCCAAAACCTCTCAAGGAAAGCCACTCACCGTGCAAATGATCGAGAACCCTCAACCACGGACTCCGTCCAGA
TGAGGGAGAGGGACGTCTCCTCTACAAGAAGGAGAACCCTACCAAGGAGAACGCTGTGTTCTTTCTCCAG
AGGCTGCTAAGATCCAACCTCGCTGAGACCGTGGATTTTCATCAACCCTGCTAAGAACGAGGGAATCGAGCCA
TCTGTGGTGGGAGCTCTCGTGTACCAACGTCTCATCGCTTACCACCCATTCGCTGAGGGAAACGGACGTAT
GGCTCGTGTGATCGTGAACAAGATCCTCCTCGATGCTGGATACCCAGCTTTTACCAAGTTCCTCTGATGAGT
TCGAGCCACAAATCATCCACAAACCAAGGCTTCTACCAAGTCTGCTACCTCTTCTGAGGTGGTGGTGGAG
TTCCTCAAGGAGCTCGCTAAGAAGGGATCTAAGGAGGATAACGAGCAAAACCTCGAGAAGACCGATCGTAC
CTCTACCGATCTCACCGAGTCTGCTGTGGAGAACTCTGCTGCTCTCTCT
```

```
>DR2_Domain_Codon_optimized_for_Tp_Start_Met_added_H:A_mutant
ATGTCTGTGAACGAGGTGGCTCCACTCTCTTCTGTGCCAGCTGAGCTCAAGGATGCTGCTGGAGGAAACAA
GAAGGCTGCTGAGAAGTCTGAGGGAGCTACCGGAGTGGAGAAGGAGAAGACCACCCTCTTCCAACGTGTGA
AGCAATTCTTACCAGGATCTAAGTCTGGAGCTAAGCCAGTGGCTGGAGATGAGACCGCTAACAAGGTGAAC
TACCAAGATCTCGAGGATAACCTCAACCTCAAGGGACTCATCTCTCTCGAGGATGATCGTAACGCTAACCTT
CGAGTCTAACGTGCTCAAGAACGAGAAGTTCCTCGATGAGGCTCGTGAGATCTCTAAGAAGTCTATCCCAG
AGGCTACCGTGAAGCAAATGTCTCACCTCCCAGAGTTCGATGATATCCTCACCGAGGGAGCTAAGAAGGTG
GAGTCTCGTATCAACAAGGCTATCACCTTCCGTCCATCTGTGGAGGAGTTCCTCTGAGATCCAAGATCTCGT
GAAGACCCTCCCAAAGACCAAGGTGATCGAGGATCTCTCTACCAAGACCAACGAGATCACCGAGGCTCTCG
CTGCTACCTCTAAGACCATCCAACGTACCCAGAGCTCAAGGAGCAACTCAAGACCGCTATCGAGGATTTTC
CTCCAAAACCTCTCAAGGAAAGCCACTCACCGTGCAAATGATCGAGAACCCTCAACCACGGACTCCGTCCAGA
TGAGGGAGAGGGACGTCTCCTCTACAAGAAGGAGAACCCTACCAAGGAGAACGCTGTGTTCTTTCTCCAG
AGGCTGCTAAGATCCAACCTCGCTGAGACCGTGGATTTTCATCAACCCTGCTAAGAACGAGGGAATCGAGCCA
TCTGTGGTGGGAGCTCTCGTGTACCAACGTCTCATCGCTTACgctCCATTTCGCTGAGGGAAACGGACGTAT
GGCTCGTGTGATCGTGAACAAGATCCTCCTCGATGCTGGATACCCAGCTTTTACCAAGTTCCTCTGATGAGT
TCGAGCCACAAATCATCCACAAACCAAGGCTTCTACCAAGTCTGCTACCTCTTCTGAGGTGGTGGTGGAG
TTCCTCAAGGAGCTCGCTAAGAAGGGATCTAAGGAGGATAACGAGCAAAACCTCGAGAAGACCGATCGTAC
CTCTACCGATCTCACCGAGTCTGCTGTGGAGAACTCTGCTGCTCTCTCT
```

### b) Amino acid alignment of mutant vs. native IbpA DR2 domain:

|                                 | 1                             | 10                                                            | 20                                          | 30                                        | 40               | 50         | 60  | 70 |
|---------------------------------|-------------------------------|---------------------------------------------------------------|---------------------------------------------|-------------------------------------------|------------------|------------|-----|----|
| HSDR2_CO_H:A mutant translation | MSVNEVAPLSSVPAELKDAAGNKKAAEKS | EGATGVEKEK                                                    | TLFQRVKQFF                                  | TGSKSGAK                                  | PVAGDETANKVNY    | QDLEDN     |     |    |
| DR2_native                      | MSVNEVAPLSSVPAELKDAAGNKKAAEKS | EGATGVEKEK                                                    | TLFQRVKQFF                                  | TGSKSGAK                                  | PVAGDETANKVNY    | QDLEDN     |     |    |
| HSDR2_CO_H:A mutant translation | LN                            | LKGLISLEDDRNANFESNVLKNEKFLDEARE                               | EISKKS                                      | IPEATVVKQMSHLPEFDDILTEGAKKVESRINKAITFRPSV |                  |            |     |    |
| DR2_native                      | LN                            | LKGLISLEDDRNANFESNVLKNEKFLDEARE                               | EISKKS                                      | IPEATVVKQMSHLPEFDDILTEGAKKVESRINKAITFRPSV |                  |            |     |    |
| HSDR2_CO_H:A mutant translation | EEFSEIQDLVKTLPKTKVIEDLS       | TKTNEITEALAA                                                  | TSKTIQRTPELKEQLKTAIEDFLQNSQGKPLTVQMIENLNHGL |                                           |                  |            |     |    |
| DR2_native                      | EEFSEIQDLVKTLPKTKVIEDLS       | TKTNEITEALAA                                                  | TSKTIQRTPELKEQLKTAIEDFLQNSQGKPLTVQMIENLNHGL |                                           |                  |            |     |    |
| HSDR2_CO_H:A mutant translation | R                             | PDEGEGRLLYKKNLTKENAVFSSPEAAKIQLAETVDFINRAKNEGIEPSVVGALVYQRLIA | Y                                           | PPFAE                                     | NGR              | MAR        | VI  |    |
| DR2_native                      | R                             | PDEGEGRLLYKKNLTKENAVFSSPEAAKIQLAETVDFINRAKNEGIEPSVVGALVYQRLIA | Y                                           | PPFAE                                     | NGR              | MAR        | VI  |    |
| HSDR2_CO_H:A mutant translation | V                             | NKILLDAGYPAFTKPSDEFEPQII                                      | PQTKAS                                      | TKSATSS                                   | SEVVVEFLKELAKKGS | KEDNEQNLEK | TDR | TS |
| DR2_native                      | V                             | NKILLDAGYPAFTKPSDEFEPQII                                      | PQTKAS                                      | TKSATSS                                   | SEVVVEFLKELAKKGS | KEDNEQNLEK | TDR | TS |
| HSDR2_CO_H:A mutant translation | S                             | AALS                                                          |                                             |                                           |                  |            |     |    |
| DR2_native                      | S                             | AALS                                                          |                                             |                                           |                  |            |     |    |

Supplementary Table S1. Primers used for amplification and construct synthesis

| Gene             | Construct             | Forward Primer                   | Reverse Primer                  |
|------------------|-----------------------|----------------------------------|---------------------------------|
| lbpA DR2         | Codon optimized gene  | 5'- ATGTCTGTGAACGAGGTGGTC-3'     | 5'- AGAGAGAGCAGCAGAGTTCTCC -3'  |
| Thaps3<br>270141 | Chloroplast targeting | 5'- ATGAGACTCTCCATCGCAACTATA -3' | 5'- ACCCCACTTCAAGATTGCTGCAC -3' |
